# Supplementary material for: The first gapless, reference-quality, fully annotated genome from a Southern Han Chinese individual
Source: PubMed Central journal article supplement (PMC9997556; doi:10.1093/g3journal/jkac321), 2023-01-11
Supplement: jkac321_supplementary_data.pdf [file jkac321_supplementary_data.pdf]

## Supplementary Materials

We used the ‘`chromosome_scaffolder.sh`’ script that is part of MaSuRCA assembler to close gaps in the chromosome scaffolds. `chromosome_scaffolder.sh` is a wrapper for the published SAMBA scaffolder, whose function is to split the scaffolds at gaps (runs of N’s), record which contigs are adjacent in the scaffolds and then run SAMBA to close as many gaps as possible. We first closed gaps using the HiFi reads, then we used the Flye assembly, and finally we used the CHM13 sequence. Some gaps required manual intervention because they could not be closed automatically due to misassemblies in the contigs surrounding the gap. An example of such misassembly is shown in FigureS2. This was the misassembly on chromosome 13 that resulted in a gap that could not be automatically closed due to a misassembly in the contig on the right side of the gap. Another reason for failing to close a gap automatically is presence of redundant haplotype contigs. These contigs would end up next to each other in the chromosome scaffold. We screened for these contigs by aligning them to the bigger contigs surrounding them, and if they aligned with >95% similarity over >75% of their length, we eliminated these contigs. After these fixes we re-ran the chromosome scaffolder to close gaps with the CHM13 sequence and the software was able to close the remaining gaps.

**Table S1** MaSuRCA chromosome scaffolder aligned the HG60021 hifiasm assembly back to T2T-CHM13 and identified 12 misassembled contigs. 12 contigs are grouped by colors and listed with their corresponding alignments on T2T-CHM13. They are further split into 30 contigs for the later gap closing step.

| <b>Contig</b>                  | <b>Chromosome</b> | <b>Start position</b> | <b>End position</b> |
|--------------------------------|-------------------|-----------------------|---------------------|
| ptg0000021:1-4002663.3390039   | chr21             | 2237596               | 2850180             |
| ptg0000231:1-31662945.0        | chr22             | 21259644              | 37872816            |
| ptg0000231:1-31662945.16613180 | chr22             | 21019534              | 21259634            |
| ptg0000231:1-31662945.16853284 | chr22             | 18572419              | 21019533            |
| ptg0000231:1-31662945.19300419 | chr22             | 7043342               | 18572407            |
| ptg0000231:1-31662945.30916244 | chr14             | 3965110               | 4164595             |
| ptg0000231:1-31662945.31115731 | chr14             | 3419478               | 3965107             |
| ptg0000341:1-2552660.2102886   | chr13             | 5341145               | 5732177             |
| ptg0000341:1-2552660.2493921   | chr22             | 4756012               | 4811746             |
| ptg0000411:1-36579044.0        | chr21             | 10974308              | 43493444            |
| ptg0000411:1-36579044.32519157 | chr21             | 8874250               | 10981776            |
| ptg0000411:1-36579044.34743316 | chr13             | 12004300              | 11911689            |
| ptg0000501:1-2649560.0         | chr22             | 4726319               | 5872794             |
| ptg0000501:1-2649560.94034     | chr22             | 4497857               | 4726318             |
| ptg0000511:1-95769069.0        | chr14             | 12624545              | 101435482           |
| ptg0000511:1-95769069.88825502 | chr14             | 11781332              | 11963118            |
| ptg0000511:1-95769069.89007289 | chr14             | 11400175              | 11777238            |
| ptg0000511:1-95769069.89139042 | chr14             | 4448799               | 11402427            |
| ptg0000511:1-95769069.94824504 | chr15             | 3814704               | 4438381             |
| ptg0000511:1-95769069.95448182 | chr14             | 3492199               | 3621056             |
| ptg0000551:1-11434566.2203892  | chr21             | 8146412               | 8874251             |
| ptg0000551:1-11434566.3096637  | chr13             | 12283321              | 20621247            |
| ptg0000851:1-1069922.0         | chr19             | 20040                 | 42270               |
| ptg0000851:1-1069922.22234     | chr9              | 147007499             | 147945090           |
| ptg0001061:1-627290.48764      | chr16             | 94798325              | 95340137            |

|                          |       |         |         |
|--------------------------|-------|---------|---------|
| ptg000129c:1-44968.25395 | chr14 | 3392578 | 3409290 |
| ptg000142l:1-68776.0     | chr15 | 3043282 | 3063829 |
| ptg000142l:1-68776.25372 | chr15 | 3052332 | 3083365 |
| ptg000142l:1-68776.56388 | chr22 | 5512086 | 5524472 |
| ptg000147c:1-90021.38392 | chr22 | 5966074 | 5975956 |

**Table S2** The misassembly positions in Han1 draft assembly.

| <b>Chromosome</b> | <b>Misassembly position on Han1 draft assembly</b> | <b>Type of misassembly</b> |
|-------------------|----------------------------------------------------|----------------------------|
| Chr13             | 459,155                                            | Wrong order misassembly    |
| Chr13             | 485,169                                            | Wrong order misassembly    |
| Chr14             | 2,763,805                                          | haplotype variant          |
| Chr14             | 5,306,367                                          | haplotype variant          |
| Chr15             | 19,546,254                                         | Wrong order misassembly    |
| Chr22             | 6,523,416                                          | haplotype variant          |
| Chr22             | 11,003,500                                         | haplotype variant          |

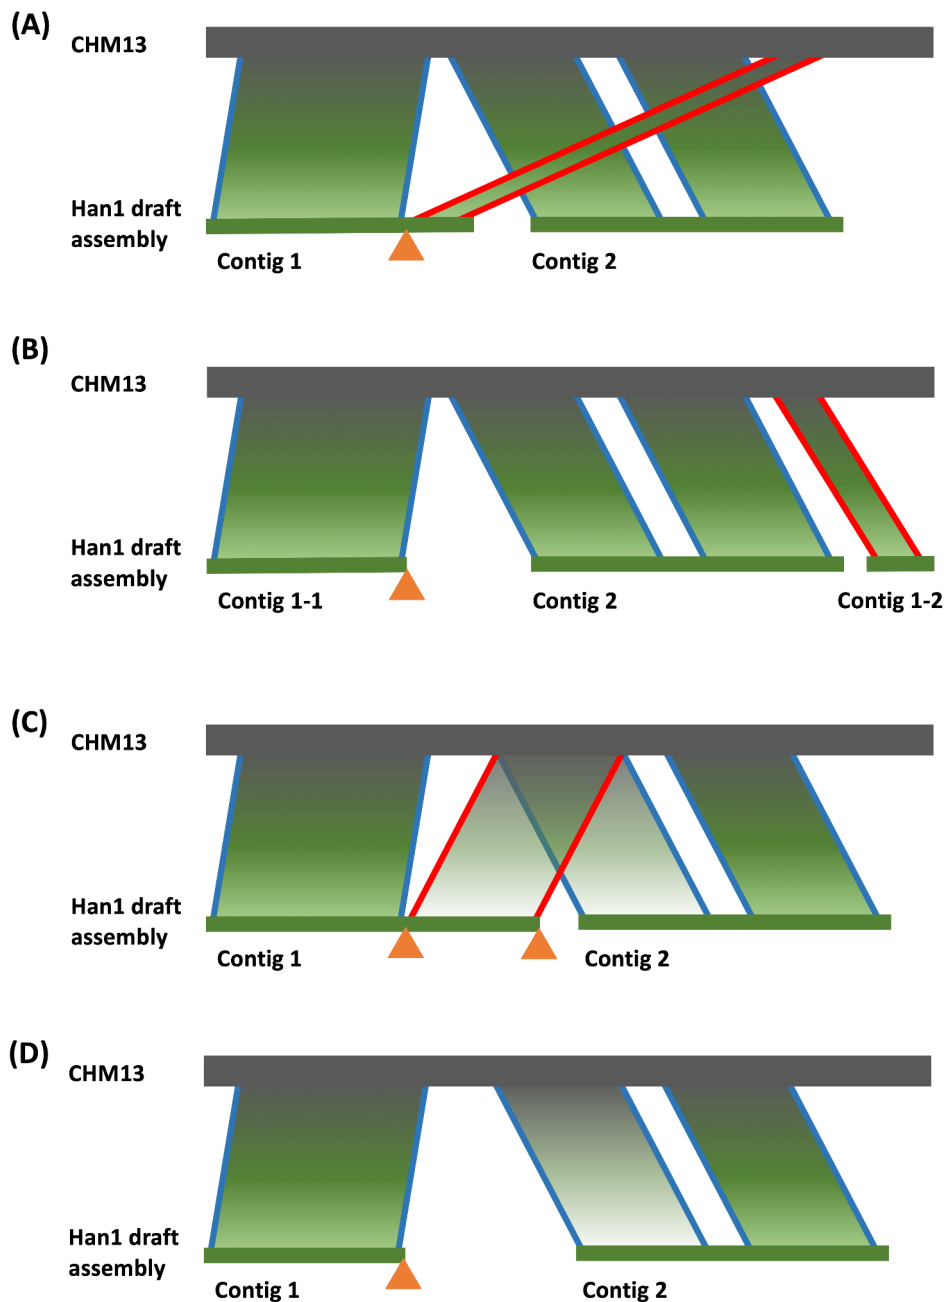

**Figure S1** The schematic plots show the process of solving misassembled contigs in Han1 draft assembly. (A) and (B) show the wrong-order misassembly. (A) shows two contigs in Han1 draft assembly, Contig1 and Contig 2, aligning to T2T-CHM13. The parallelograms with blue borders represent alignments between T2T-CHM13 and Han1 draft assembly that are in the correct order whereas the parallelogram with the red border represents the alignment that is in the wrong order. The orange triangle pointed at the misassembly position on the Han1 draft assembly. (B) shows our strategy to fix the misassemblies. We split Contig 1 into Contig 1-1 and Contig 1-2, moved Contig 1-2 to the back so that it is in the same order as T2T-CHM13, and re-ran SAMBA scaffolder to fill in gaps using contigs of ONT Flye assembly or T2T-CHM13 sequences. In total, we detected three wrong-order misassemblies in the Han1 draft assembly. This type of misassembly was found in repetitive regions like centromeres and telomeres.

(C) and (D) show the redundant haplotype variant. (C) shows that both the later part of Contig 1 and the front part of Contig 2 map to the same region on T2T-CHM13. We compared the alignment score for both alignments and removed the one with the lower quality. In this example, the alignment highlighted with the red parallelogram was removed. The two boundaries of this haplotype-variant are marked with orange triangles. (D) We trimmed Contig 1 to the first orange triangle and re-ran SAMBA scaffolder to fill in gaps using contigs of ONT Flye assembly or T2T-CHM13 sequences. We detected 2 redundant haplotype variants on chr14 and chr22 in the Han1 draft assembly and recorded 4 positions. In total, we detected 7 misassembly positions in the Han1 draft assembly after our scaffolding pipeline and listed them in **Table S4**.

**Table S3** Genes that have at least one homozygous, non-SNP mutation in Han1 as compared to T2T-CHM13. Genes whose names begin with "LOC" are proteins with no known function. Genes whose names begin with "OR" are olfactory receptors. A frameshift is an insertion or deletion in the coding portion of the transcript that is not a multiple of 3 in length. A 3' truncation denotes a truncated transcript where the lost sequence will produce a shorter protein. A "start lost" is either a truncation that deletes the 5' end of the transcript including the start codon, or a mutation that changes the start codon to a different codon. A "stop gain" refers to a mutation that creates a stop codon, producing a shorter protein without necessarily altering the transcript length.

| Mutation group | Gene name                                                                                                                                                                                                                                                                                                                                                                                         |
|----------------|---------------------------------------------------------------------------------------------------------------------------------------------------------------------------------------------------------------------------------------------------------------------------------------------------------------------------------------------------------------------------------------------------|
| frameshift     | AQP12A,<br>DEFB126,<br>GOLGA6L10,<br>IGLV4-60,<br>KLHDC7B,<br>LOC105373102,<br>LOC105375947,<br>LOC112268186,<br>LOC124900476,<br>LOC124900994,<br>LOC124900995,<br>LOC124901041,<br>LOC124901234,<br>LOC124903219,<br>LOC124903621,<br>LOC124903828,<br>LOC124903856,<br>LOC124904770,<br>LOC124904774,<br>LOC124908048,<br>MUC19,<br>NBPF19,<br>OR4L1,<br>OR7G3,<br>RP1L1,<br>TMEM82,<br>TRAJ52 |
| 3' truncation  | IGKV7-3,<br>LOC124901069,<br>LOC124901481,<br>LOC124904063,<br>LOC124904417,<br>LOC124905956,<br>OR1E2,<br>OR4E1,<br>OR4F29,<br>OR51I2,<br>PBOV1,<br>RETNLB,<br>TCP11X1,<br>TPSB2                                                                                                                                                                                                                 |
| start lost     | LOC105377805,<br>LOC124903229,<br>LOC124905153                                                                                                                                                                                                                                                                                                                                                    |
| stop gained    | KIR2DL3,<br>LOC124901163                                                                                                                                                                                                                                                                                                                                                                          |

**Table S4** Genes that have more than one copy fewer in Han1 compared to T2T-CHM13.

| Copy number in T2T-CHM13 | Genes in T2T-CHM13                                                                                                                                                                                                                                                                                                                                                                        | Copy number in Han1 | Genes in Han1                                                                                                                                                              |
|--------------------------|-------------------------------------------------------------------------------------------------------------------------------------------------------------------------------------------------------------------------------------------------------------------------------------------------------------------------------------------------------------------------------------------|---------------------|----------------------------------------------------------------------------------------------------------------------------------------------------------------------------|
| 5                        | IGHVIII-13-1_4, IGHVIII-13-1_1, IGHVIII-13-1, IGHVIII-13-1_3, IGHVIII-13-1_2                                                                                                                                                                                                                                                                                                              | 3                   | IGHVIII-13-1_4, IGHVIII-13-1_1, IGHVIII-13-1_3                                                                                                                             |
| 7                        | TBC1D3K, TBC1D3, TBC1D3D, TBC1D3L, TBC1D3G, TBC1D3H, TBC1D3B                                                                                                                                                                                                                                                                                                                              | 4                   | TBC1D3, TBC1D3L, TBC1D3H, TBC1D3B                                                                                                                                          |
| 9                        | AMY2A, AMY1A, AMY1B, AMY1C_3, AMY1C_1, AMY1C_4, AMY1C_2, AMY1C, AMY2B                                                                                                                                                                                                                                                                                                                     | 7                   | AMY2A, AMY1A, AMY1B, AMY1C_3, AMY1C_2, AMY1C, AMY2B                                                                                                                        |
| 10                       | SPDYE8, SPDYE12, SPDYE11, SPDYE10, SPDYE14, SPDYE13_1, SPDYE13, SPDYE17, SPDYE9, SPDYE15                                                                                                                                                                                                                                                                                                  | 7                   | SPDYE8, SPDYE12, SPDYE11, SPDYE10, SPDYE13_1, SPDYE17, SPDYE9                                                                                                              |
| 34                       | FAM90A14_11, FAM90A16_1, FAM90A14_6, FAM90A14_5, FAM90A14_9, FAM90A14_7, FAM90A10, FAM90A1, FAM90A9_1, FAM90A9, FAM90A19, FAM90A23_4, FAM90A16, FAM90A23, FAM90A9_2, FAM90A23_1, FAM90A16_3, FAM90A22, FAM90A16_2, FAM90A14_1, FAM90A23_3, FAM90A26, FAM90A14_2, FAM90A23_2, FAM90A8, FAM90A7, FAM90A17, FAM90A14, FAM90A14_4, FAM90A14_10, FAM90A18, FAM90A14_8, FAM90A14_3, FAM90A14_12 | 16                  | FAM90A14_5, FAM90A14_7, FAM90A1, FAM90A9_1, FAM90A19, FAM90A23_4, FAM90A23, FAM90A23_1, FAM90A22, FAM90A23_3, FAM90A26, FAM90A23_2, FAM90A8, FAM90A7, FAM90A17, FAM90A14_8 |



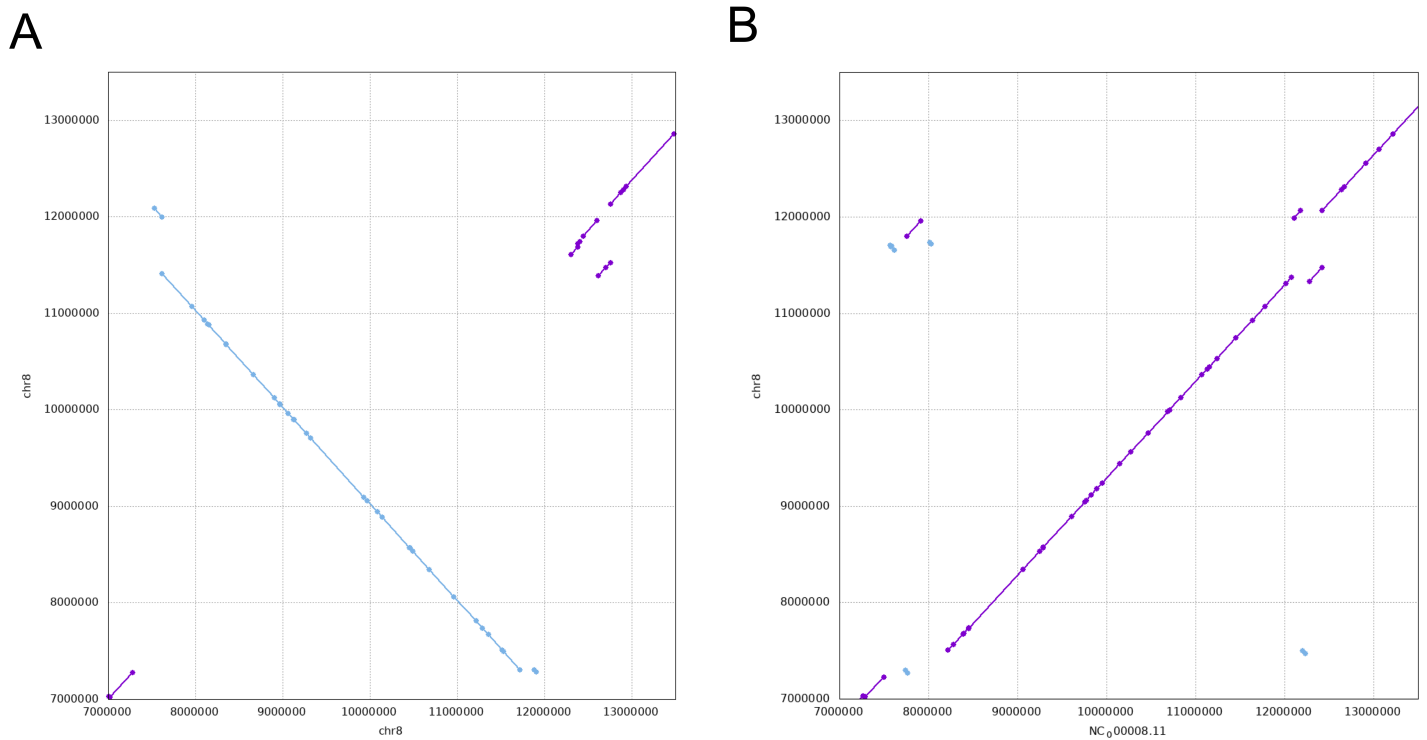

**Figure S2** The zoomed-in dotplots on chromosome 8 from 7,000,000 to 13,500,000 showing the complex  $\beta$ -defensin gene cluster locus visualized by mummerplot. The segments in purple color mean sequences in T2T-CHM13 and Han1 are in the same direction whereas the blue color means they are in the reverse direction. (A) demonstrates the inversion between T2T-CHM13 and Han1 in this region with T2T-CHM13 on the X axis and Han1 on the Y axis. (B) shows the collinearity between GRCh38 and Han1 in this region with T2T-CHM13 on the X axis and Han1 on the Y axis.
